# Supplementary material for: Arsenate decreases production of methylmercury across increasing sulfate concentration amendments in freshwater lake sediments
Source: Royal Society of Chemistry journal article supplement (doi:10.1039/d1em00543j), 2022-01-01
Supplement: d1em00543j1.pdf [file d1em00543j1.pdf]

## 1 SUPPLEMENTARY INFORMATION

### 3 Supporting information (order occurring in the text)

6 **Figure S1:** Methylation and demethylation figures for experiments testing the effect of added carbon (1  
7 mM and 10 mM). The top panel (pink points) for each lake represents the increase in Me<sup>199</sup>Hg (i.e.  
8 methylation) and the bottom panel (green points) for each lake represents the decrease in Me<sup>198</sup>Hg (i.e.  
9 demethylation). The horizontal red line is the concentration of spiked MeHg at the start (t=0) of each  
10 incubation.

12 **Figure S2:** Methylation and demethylation figures for all experiments testing the effect of sulfate and  
13 arsenate amendments, all samples also have a 1 mM carbon amendment. The top panel (pink points) for  
14 each lake represents the increase in Me<sup>199</sup>Hg (i.e. methylation) and the bottom panel (green points) for  
15 each lake represents the decrease in Me<sup>198</sup>Hg (i.e. demethylation). The horizontal red line is the  
16 concentration of spiked MeHg at the start (t=0) of each incubation.

18 **Table S1:** Chemistry of the overlying water of the sediments in each incubation experiments. Water  
19 chemistry was measured at the beginning (0h) and at the end (48h). Sulfate, sulfide, and arsenic species  
20 concentrations are measured on filtered samples. As(III) (DL : 0.049 µg/L), As(V) (DL : 0.046 µg/L),  
21 arsenobetaine (DL : 0.030 µg/L), MMA (monomethylarsonic acid, DL : 0.050 µg/L), and DMA  
22 (dimethylarsinic acid, DL : 0.023 µg/L) were measured using ICP-MS. SRM inhibitor refers to  
23 experiment which used a sulfate reducing microbial inhibitor, and abiotic inhibitor refers to experiments  
24 in which all microbial activity was ceased. N.A. : Not available, BDL : below detection limit.

26 **Figure S3:** Methylation rates, arsenite increase, and sulfide increase of treatments without carbon, only  
27 with carbon and with carbon and sulfate. These results are from preliminary experiments in which we  
28 tested the effect of 1 mM and 10 mM carbon amendments.

30 **Figure S4:** Fold change in sulfide (A) and arsenite (B) produced in overlying water during the incubation  
31 experiments.

33 **Figure S5:** Results from control experiments. Top figure show the fold change in sulfide produced in  
34 overlying water, middle figure shows the fold change in arsenite produced in overlying water and the  
35 bottom figure show methylation rate constants (with standard deviations) for control experiments. Biotic  
36 controls (biotic) were tested when all microbial activity was suppressed while sulfate reduction (SRB)  
37 controls were tested when all microbial activity from sulfate reducing microbes were suppressed.

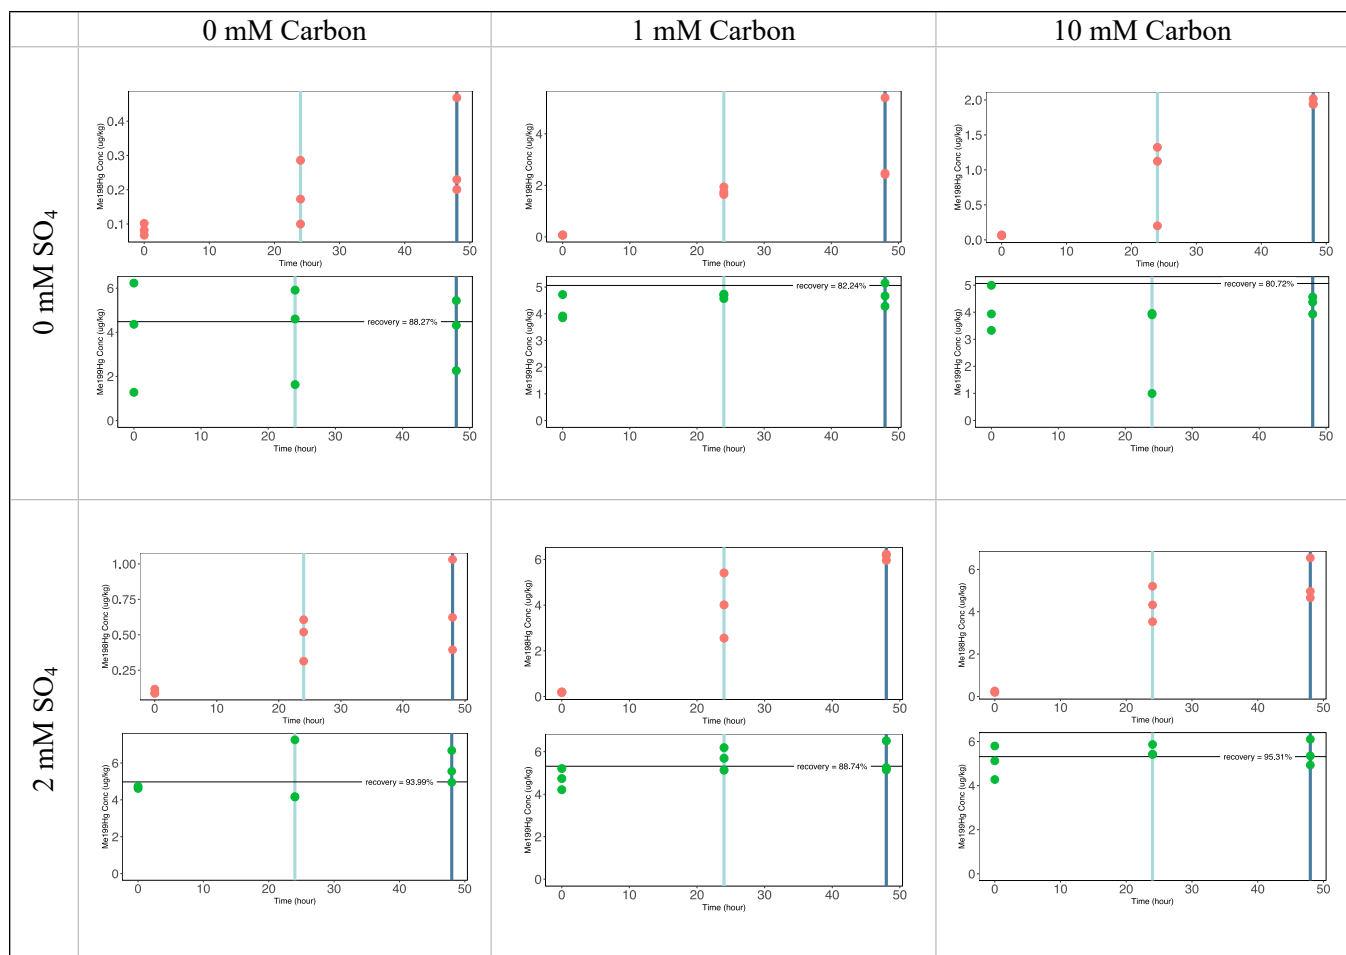

40  
41  
42  
43  
44  
45  
46  
47

**Figure S1:** Methylation and demethylation figures for experiments testing the effect of added carbon (1 mM and 10 mM). The top panel (pink points) for each lake represents the increase in Me<sup>199</sup>Hg (i.e. methylation) and the bottom panel (green points) for each lake represents the decrease in Me<sup>188</sup>Hg (i.e. demethylation). The horizontal red line is the concentration of spiked MeHg at the start (t=0) of each incubation.

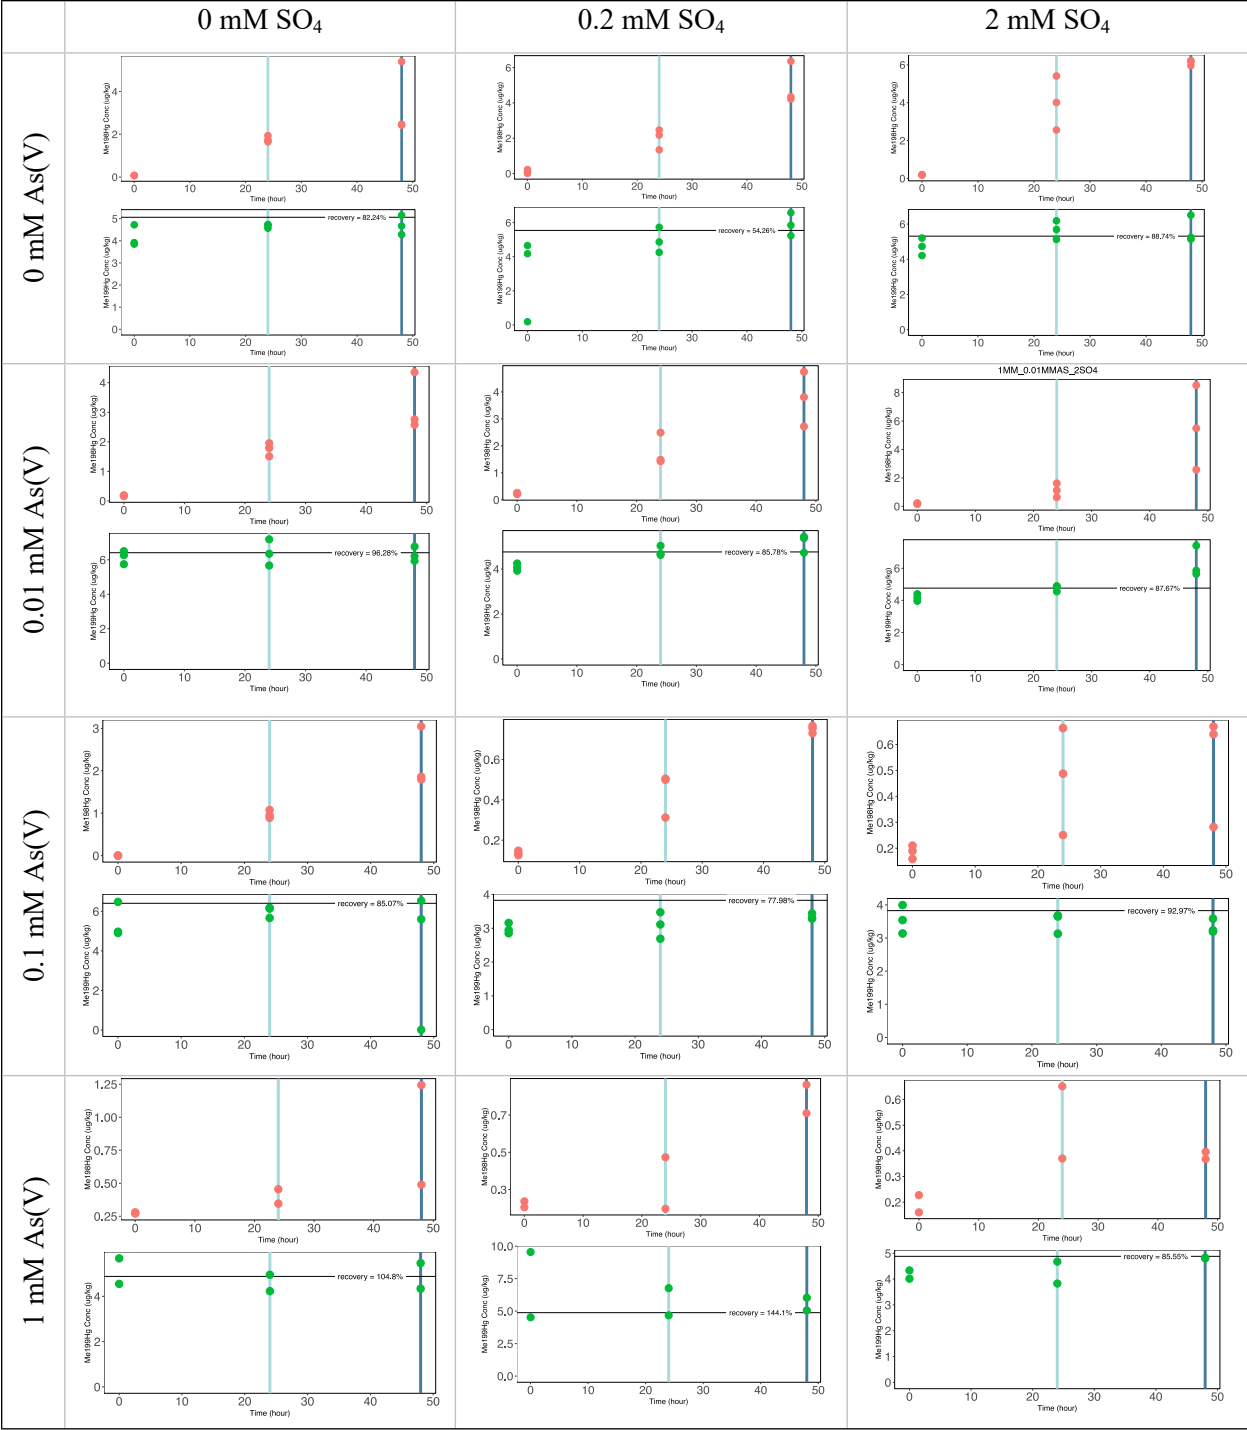

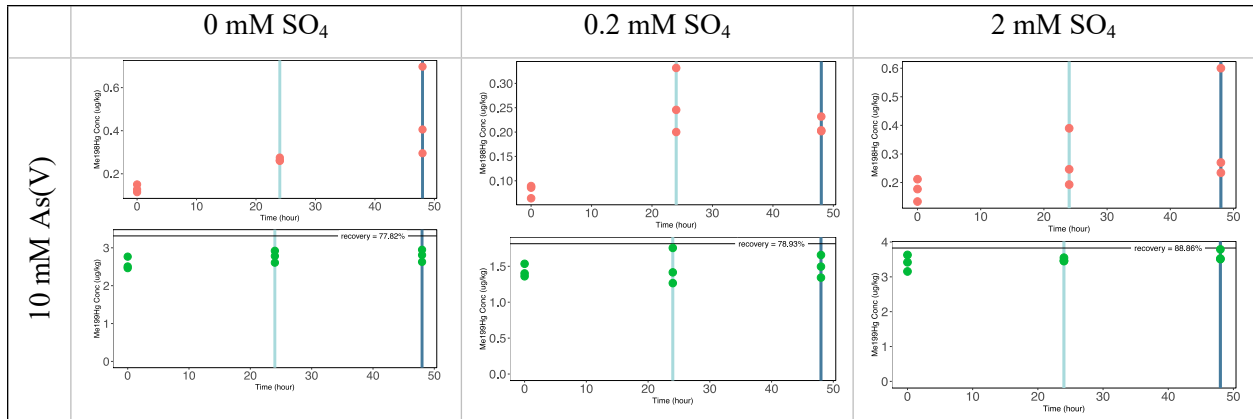

48

49 **Figure S2:** Methylation and demethylation figures for all experiments testing the effect of sulfate and  
50 arsenate amendments, all samples also have a 1 mM carbon amendment. The top panel (pink points) for  
51 each lake represents the increase in Me<sup>199</sup>Hg (i.e. methylation) and the bottom panel (green points) for  
52 each lake represents the decrease in Me<sup>198</sup>Hg (i.e. demethylation). The horizontal red line is the  
53 concentration of spiked MeHg at the start (t=0) of each incubation.  
54

55 **Table S1:** Chemistry of the overlying water of the sediments in each incubation experiments. Water chemistry was measured at the beginning (0h) and at the end (48h). Sulfate, sulfide, and  
56 arsenic species concentrations are measured on filtered samples. As(III) (DL : 0.049 µg/L), As(V) (DL : 0.046 µg/L), arsenobetaine (DL : 0.030 µg/L), MMA (monomethylarsonic acid, DL : 0.050  
57 µg/L), and DMA (dimethylarsinic acid, DL : 0.023 µg/L) were measured using ICP-MS. SRM inhibitor refers to experiment which used a sulfate reducing microbial inhibitor, and abiotic inhibitor  
58 refers to experiments in which all microbial activity was ceased. N.A. : Not available, BDL : below detection limit.  
59

| Inhibitor | carbon | sulfate | arsenate | Sulfate<br>(0h) | Sulfate<br>(48h) | Sulfide<br>(0h) | Sulfide<br>(48h) | Arsenate<br>(0h) | Arsenate<br>(48h) | Arsenite<br>(0h) | Arsenite<br>(48h) | Arsenobetaine<br>(0h) | Arsenobetaine<br>(48h) | MMA<br>(0h) | MMA<br>(48h) | DMA<br>(0h) | DMA<br>(48h) |          |
|-----------|--------|---------|----------|-----------------|------------------|-----------------|------------------|------------------|-------------------|------------------|-------------------|-----------------------|------------------------|-------------|--------------|-------------|--------------|----------|
| None      | 1      | 0       | 0        | 0.197           | 0                | 0.004           | 0.034            | 1.00E-05         | 4.67E-06          | 7.50E-05         | 3.15E-05          | 3.71E-07              | 8.98889E-07            | BDL         | BDL          | 5.9E-07     | 2.65E-06     |          |
|           |        |         | 0.01     | 0.105           | 0.037            | 0.011           | 0.019            | 0.00079          | 1.17E-05          | 0.00021          | 0.00129           | 4.49E-07              | 5.95514E-07            | BDL         | BDL          | 8.3E-07     | 6.3E-07      |          |
|           |        |         | 0.1      | 0.091           | 0.023            | 0.01            | 0.021            | 0.00267          | 5.45E-05          | 0.0002           | 0.002134          | 1.37E-06              | 1.28653E-06            | BDL         | BDL          | 6.3E-07     | 4.49E-07     |          |
|           |        |         | 1        | 0.116           | 0.125            | 0.007           | 0.005            | 0.772            | 0.746             | 0.001            | 0.018             | 5.23E-07              | 9.38777E-05            | BDL         | BDL          | 7.8E-07     | BDL          |          |
|           |        |         | 10       | 0.144           | 0.114            | 0.007           | 0.008            | 3.022            | 2.595             | 0.002            | 0.018             | 0.0001                | 0.000395129            | BDL         | BDL          | 2.8E-07     | BDL          |          |
|           |        |         | 0.2      | 0               | 0.248            | 0.088           | 0.019            | 0.042            | 1.33E-05          | 1.54E-05         | 4.58E-05          | 4.26E-05              | 2.36E-07               | 3.03375E-07 | BDL          | BDL         | 2.2E-07      | 4.35E-07 |
|           |        |         |          | 0.01            | 0.509            | 0.389           | 0.015            | 0.023            | 0.00317           | 0.00015          | 0.00014           | 0.002495              | BDL                    | BDL         | BDL          | BDL         | BDL          | BDL      |
|           |        |         |          | 0.1             | 0.444            | 0.427           | 0.016            | 0.03             | 0.03646           | 0.00096          | 0.00032           | 0.017102              | BDL                    | BDL         | BDL          | BDL         | BDL          | BDL      |
|           |        |         |          | 1               | 0.399            | 0.367           | 0.005            | 0.006            | 0.68708           | 0.5996           | 0.00087           | 0.018745              | 0.00067                | 0.000106069 | BDL          | BDL         | BDL          | BDL      |
|           |        |         |          | 10              | 0.512            | 0.501           | 0.011            | 0.011            | 4.55968           | 2.18371          | 0.00101           | 0.002579              | 0.000061               | 0.000429939 | BDL          | BDL         | 2.1E-06      | BDL      |
|           | 2      | 0       | 1.135    | 1.097           | 0.009            | 0.054           | 0.00251          | 0.00015          | 0.0002            | 0.001594         | 5.84E-07          | 4.045E-07             | BDL                    | BDL         | 1.1E-06      | 4.78E-07    |              |          |
|           |        | 0.01    | 2.014    | 1.946           | 0.015            | 0.03            | 0.00251          | 0.00015          | 0.0002            | 0.001594         | 4.89E-07          | N.A.                  | BDL                    | BDL         | 8.3E-07      | BDL         |              |          |
|           |        | 0.1     | 1.88     | 1.998           | 0.014            | 0.027           | 0.03582          | 0.00187          | 0.00067           | 0.032429         | N.A.              | N.A.                  | N.A.                   | N.A.        | N.A.         | N.A.        |              |          |
|           |        | 1       | 1.951    | 1.878           | 0.006            | 0.005           | 0.74814          | 0.63362          | 0.00047           | 0.017917         | N.A.              | N.A.                  | N.A.                   | N.A.        | N.A.         | N.A.        |              |          |
|           |        | 10      | 2.093    | 1.831           | 0.017            | 0.01            | 4.41121          | 3.8251           | 0.0024            | 0.024833         | N.A.              | N.A.                  | N.A.                   | N.A.        | N.A.         | N.A.        |              |          |
|           | 0      | 0       | 0        | 0               | 0.156            | 0.142           | 0.005            | 0.006            | 1.39E-05          | 1.34E-05         | 9.77E-05          | 7.57E-05              | 2.64049E-07            | 3.37083E-07 | BDL          | BDL         | 4.8E-07      | 5.51E-07 |
|           |        |         |          | 2               | 1.352            | 1.24            | 0.006            | 0.006            | 1.90E-05          | 2.66E-05         | 0.00015           | 0.000151              | 2.86521E-07            | 2.75285E-07 | BDL          | BDL         | 1.1E-06      | 8.55E-07 |
|           |        | 10      | 0        | 0               | 0.102            | 0.091           | 0.005            | 0.018            | 1.05E-05          | 7.34E-06         | 9.41E-05          | 6.58E-05              | 3.31465E-07            | 3.70792E-07 | BDL          | BDL         | 3.2E-07      | 4.57E-07 |
|           |        |         |          | 2               | 1.043            | 0.795           | 0.007            | 0.065            | 1.54E-05          | 9.88E-06         | 8.87E-05          | 7.96E-05              | 2.64049E-07            | 2.58431E-07 | BDL          | BDL         | 4.4E-07      | 4.42E-07 |
|           | SRB    | 1       | 0        | 0               | 0.839            | 0.449           | 0.004            | 0.004            | 0.00024           | 7.03E-05         | 8.93E-05          | 0.000226              | BDL                    | BDL         | BDL          | BDL         | BDL          | 1.27E-06 |
| 0.1       |        |         |          | 1.105           | 0.721            | 0.011           | 0.002            | 0.03262          | 0.00059           | 0.00023          | 0.036145          | BDL                   | BDL                    | BDL         | BDL          | 1.3E-07     | BDL          |          |
| biotic    | 1      | 0       | 0        | 0.22            | 0.22             | 0.002           | 0.002            | 5.74E-05         | 5.68E-05          | 8.16E-06         | 6.74E-06          | BDL                   | BDL                    | BDL         | BDL          | BDL         | BDL          |          |

|

**0.1** |

0.01

0.034

0.004

0.001

0.03349

0.03657

9.94E-05

9.90E-05

BDL

BDL

BDL

BDL

BDL

BDL

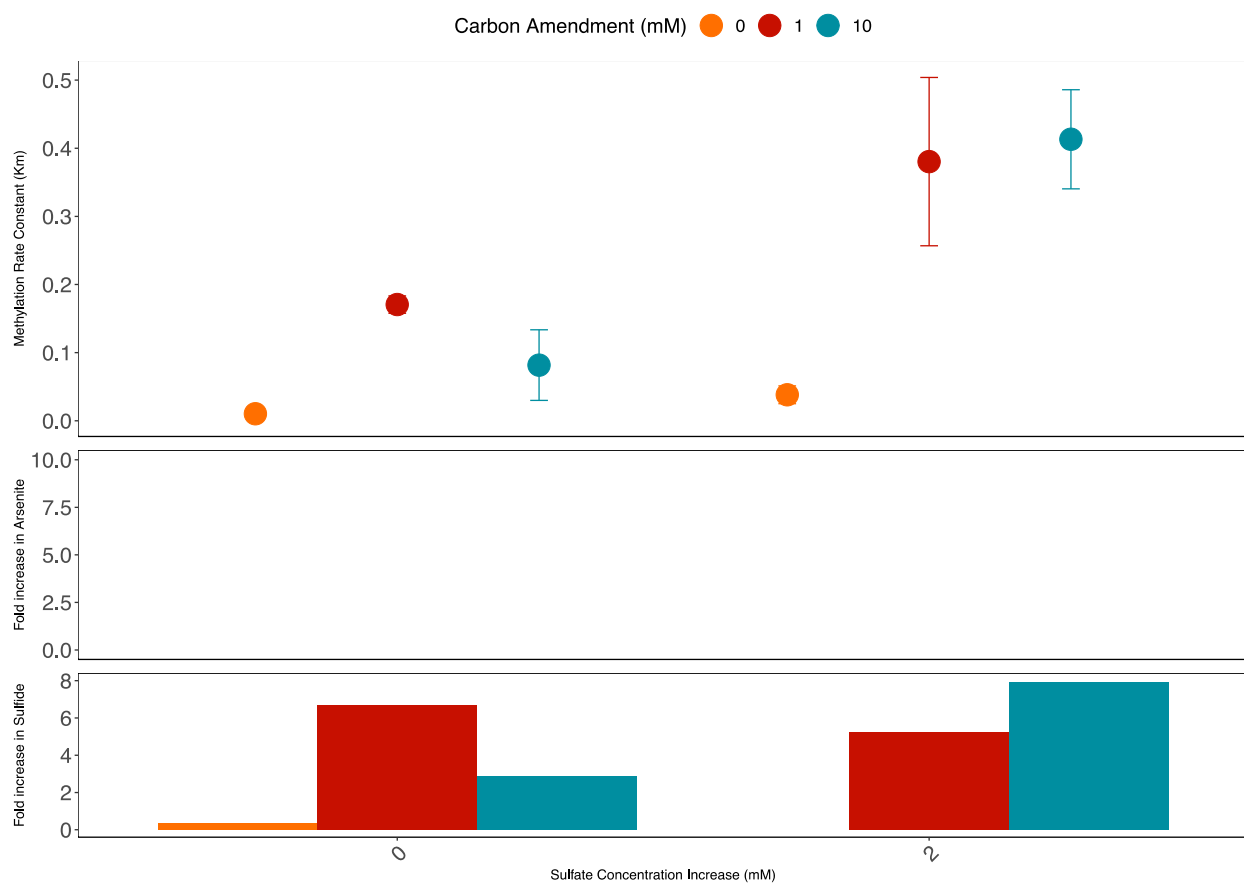

62

63 **Figure S3:** Methylation rates, arsenite increase (none detected), and sulfide increase of treatments without  
 64 carbon, only with carbon and with carbon and sulfate. These results are from preliminary experiments in  
 65 which we tested the effect of 1 mM and 10 mM carbon amendments.

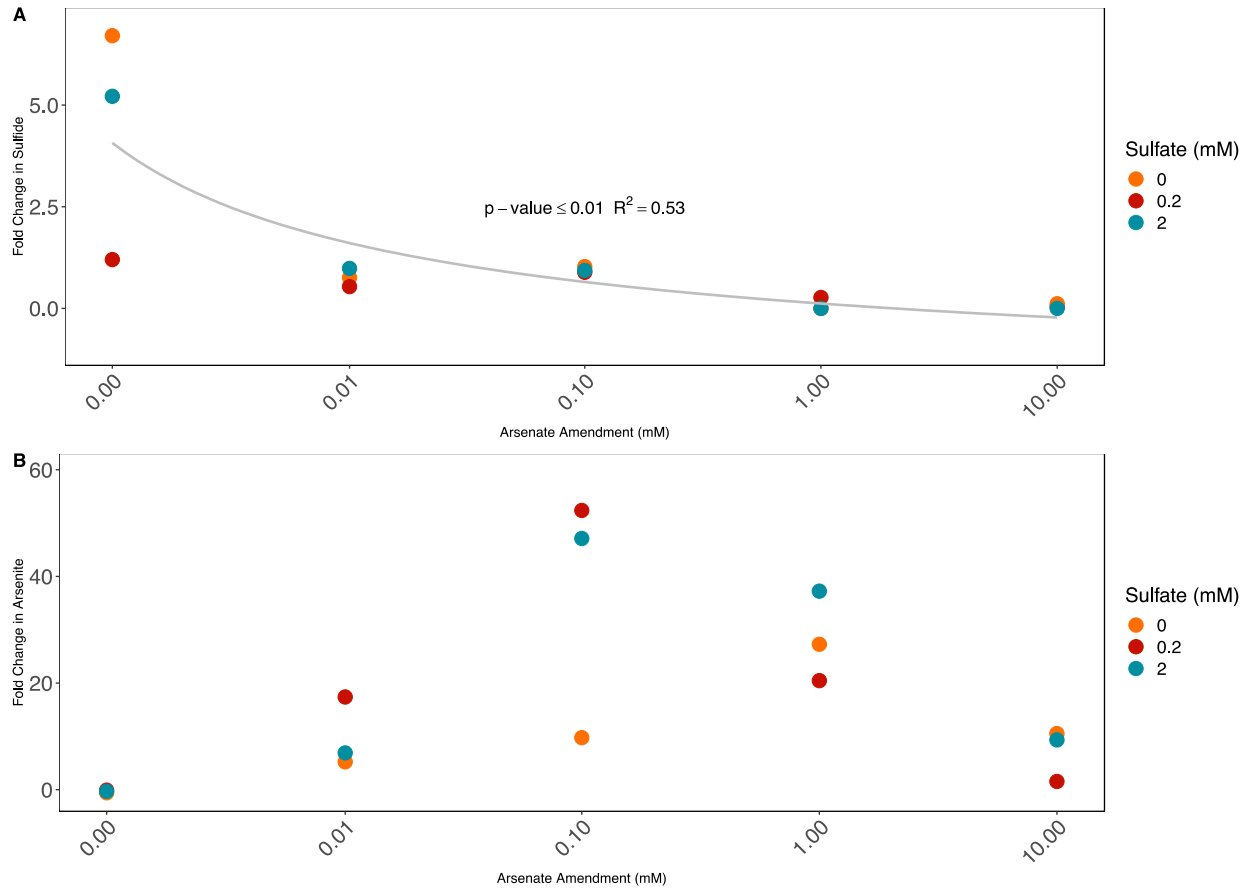

66  
 67 **Figure S4:** Fold change in sulfide (A) and arsenite (B) produced in overlying water during the incubation  
 68 experiments.  
 69



70

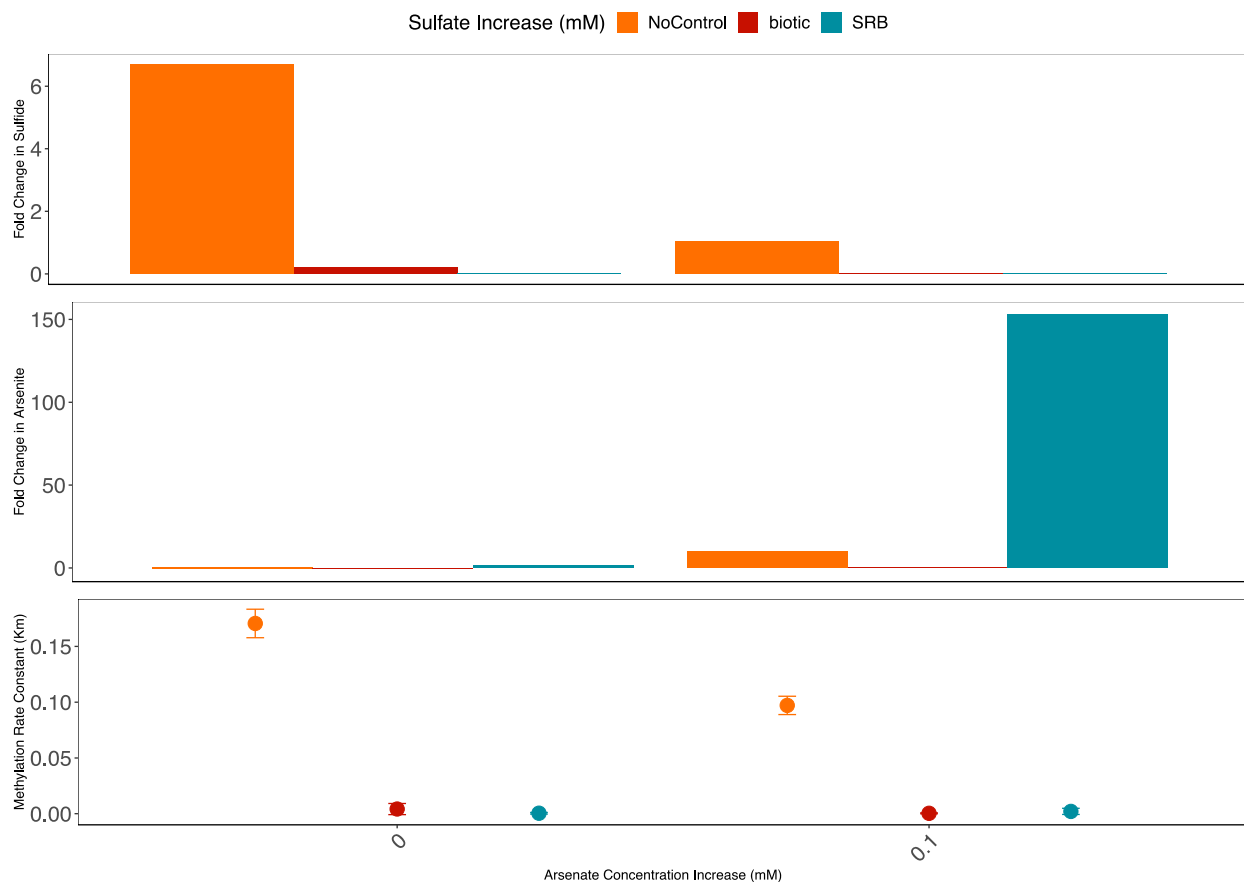

71  
72

73 **Figure S5:** Results from control experiments. Top figure show the fold change in sulfide produced in  
74 overlying water, middle figure shows the fold change in arsenite produced in overlying water and the  
75 bottom figure show methylation rate constants (with standard deviations) for control experiments. Biotic  
76 controls (biotic) were tested when all microbial activity was suppressed while sulfate reduction (SRB)  
77 controls were tested when all microbial activity from sulfate reducing microbes were suppressed.  
78
